# Supplementary material for: Oligomerization Strategy of D-A-Type Conjugated Molecules for Improved NIR-II Fluorescence Imaging
Source: MDPI journal article supplement (doi:10.3390/polym15163451), 2023-08-18
Supplement: s1 [file s1]

## Supplementary Materials

# Oligomerization strategy of D-A-type conjugated molecules for improved NIR-II fluorescence imaging

Tongqing Zou <sup>§</sup>, Yu Liu <sup>§</sup>, Xinyue Zhang, Lu Chen, Qinqin Xu, Yancheng Ding, Ping Li, Chen Xie <sup>\*</sup>, Chao Yin <sup>\*</sup> and Quli Fan <sup>\*</sup>

State Key Laboratory of Organic Electronics and Information Displays & Institute of Advanced Materials (IAM), Nanjing University of Posts and Telecommunications, 9 Wenyuan Road, Nanjing 210023, China

<sup>\*</sup> Correspondence: Correspondence: iamcxie@njupt.edu.cn (Chen Xie); iamcyin@njupt.edu.cn (Chao Yin); iamqlfan@njupt.edu.cn (Quli Fan) .

<sup>§</sup> These authors contributed equally (Tongqing Zou and Yu Liu)

### 1. Supporting figures

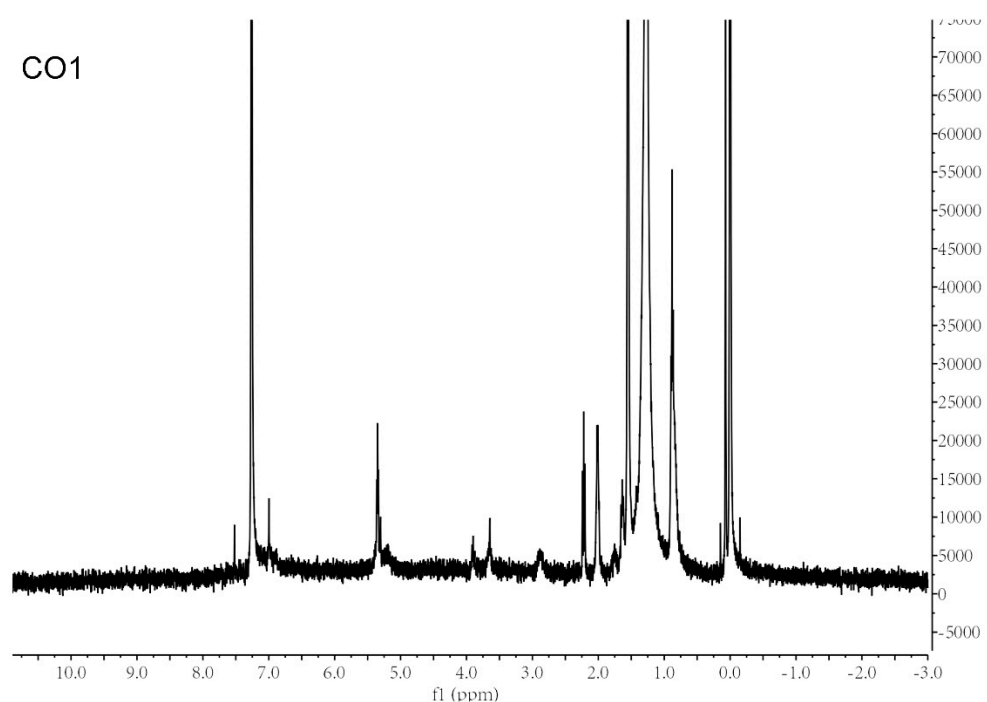

**Figure S1.** <sup>1</sup>H NMR spectrum of the CO1. CDCl<sub>3</sub> was used as the solvent.

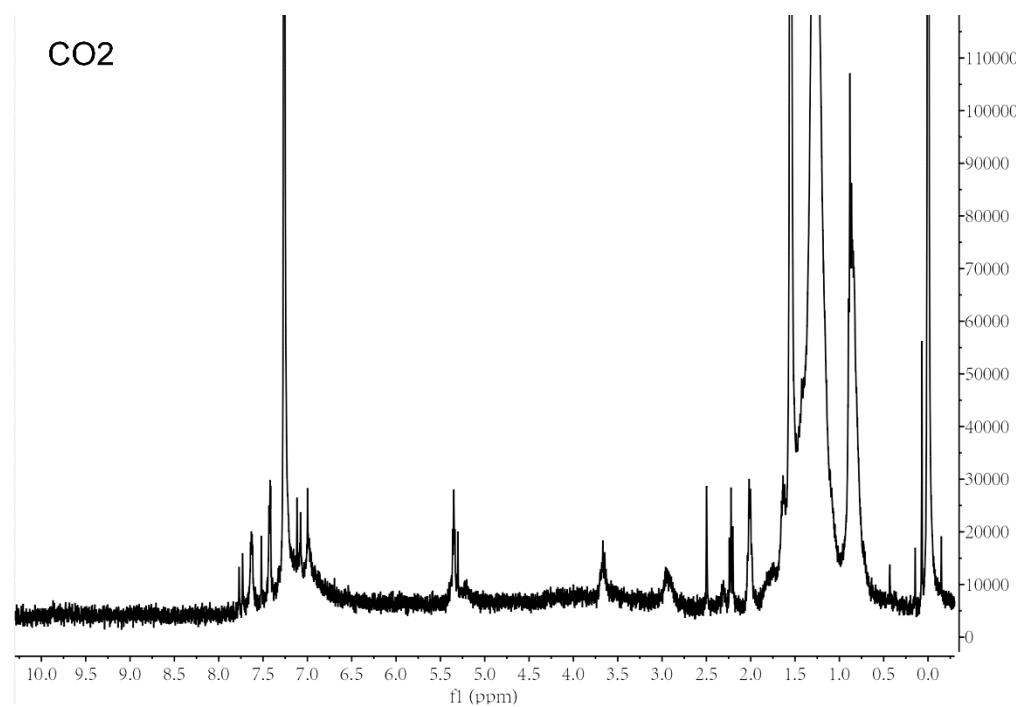

**Figure S2.**  $^1\text{H}$  NMR spectrum of the CO2.  $\text{CDCl}_3$  was used as the solvent.

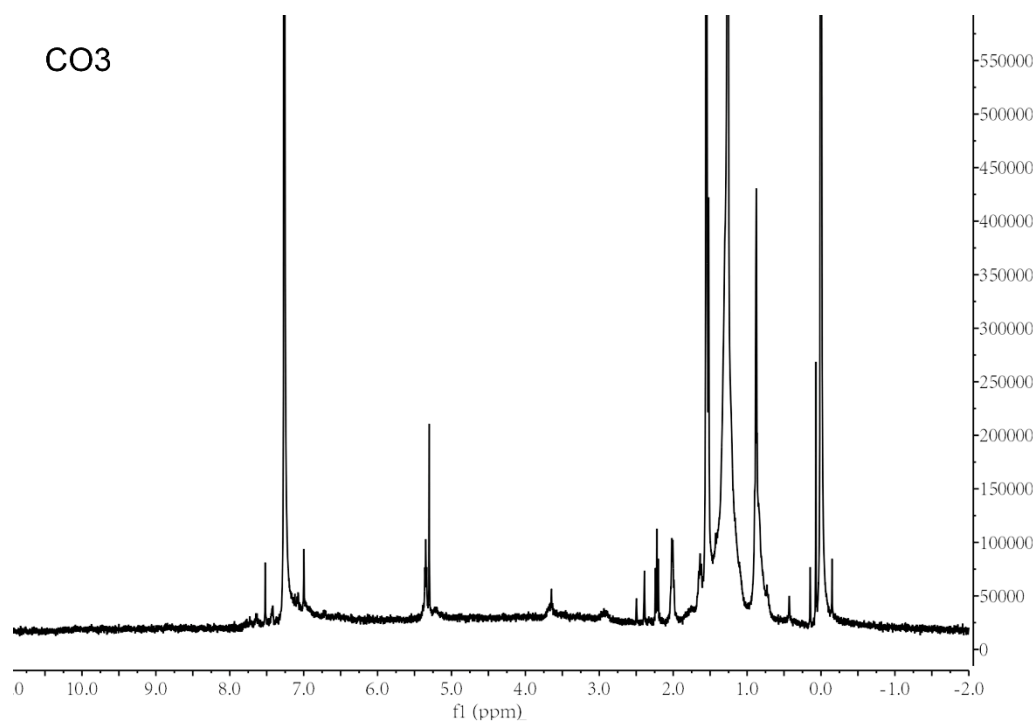

**Figure S3.**  $^1\text{H}$  NMR spectrum of the CO3.  $\text{CDCl}_3$  was used as the solvent.

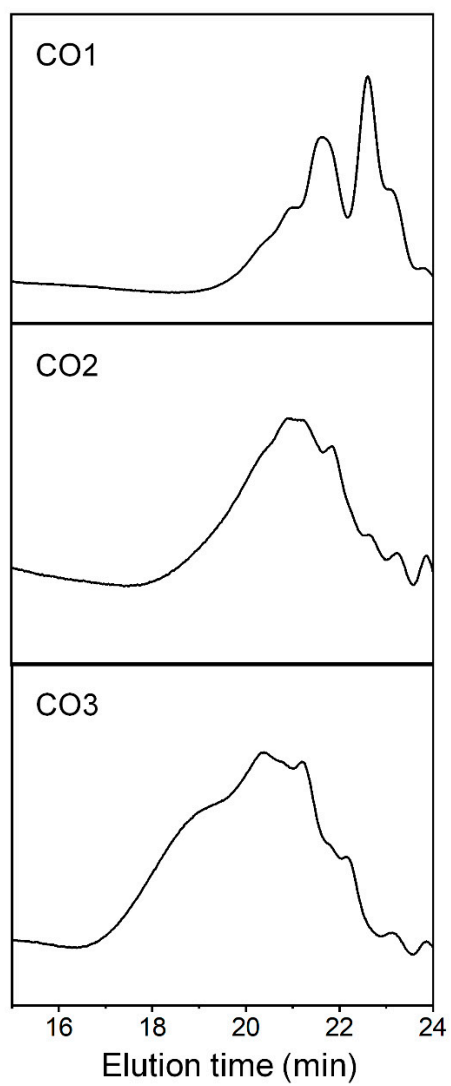

**Figure S4.** GPC curves of the CO1, CO2, and CO3.

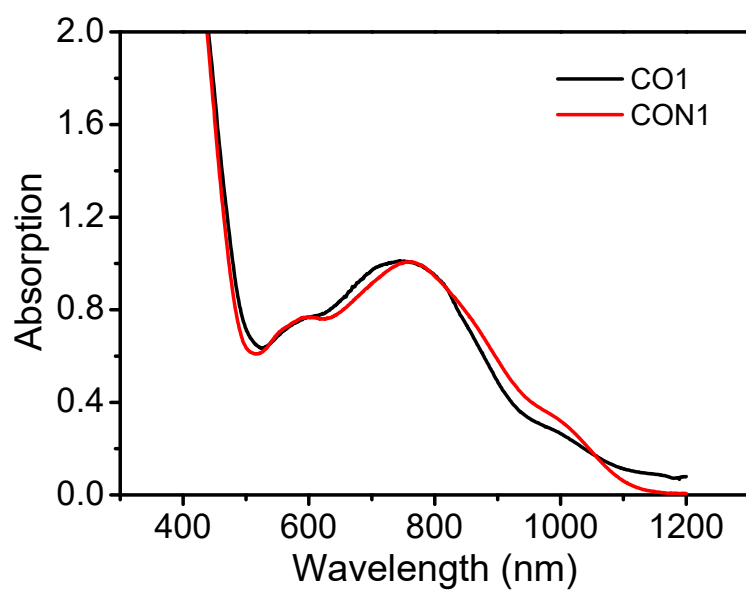

**Figure S5.** Normalized absorption spectra of CO1 and CON1.

**Table S1.** GPC results of the CO1, CO2, and CO3.

| <b>Sample name</b> | <b>Mn</b> | <b>Mw</b> | <b>PDI</b> |
|--------------------|-----------|-----------|------------|
| CO1                | 3357      | 3734      | 1.11251    |
| CO2                | 4063      | 5114      | 1.25857    |
| CO3                | 5395      | 11043     | 2.04703    |
